# Supplementary material for: The speed and metabolic cost of digesting a blood meal depends on temperature in a major disease vector
Source: Oxford University Press journal article supplement (doi:10.1242/jeb.138669), 2016-01-01
Supplement: jeb138669supp.pdf [file jeb138669supp.pdf]

### Supplemental materials

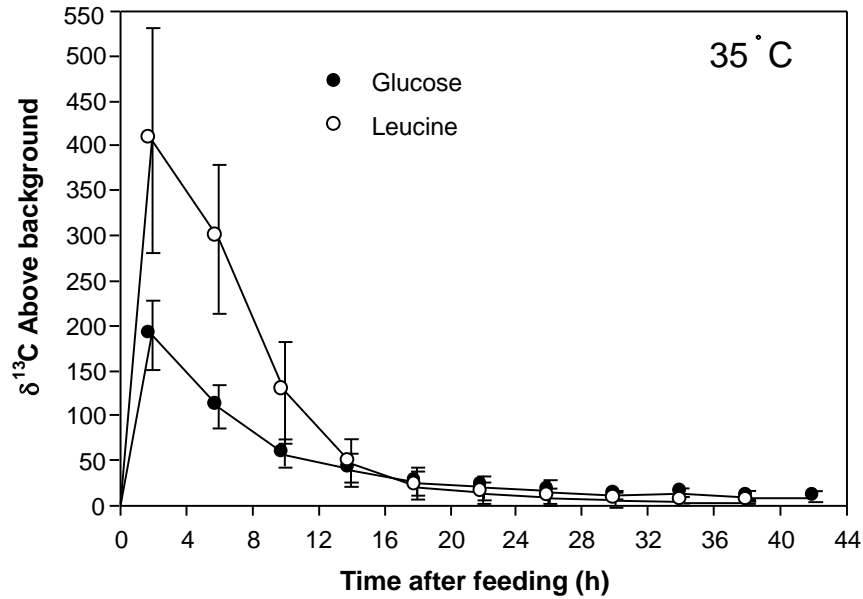

**Figure S1.** The increase in the  $^{13}\text{C}$ -content in the exhaled breath of flies digesting  $^{13}\text{C}$ -labeled blood meals at  $35^\circ\text{C}$ . The increases in  $^{13}\text{C}$ -content for each treatment groups were calculated by subtracting the  $^{13}\text{C}$ -content in the breath of flies fed blood meals containing no  $^{13}\text{C}$  tracer and are expressed in terms of  $\delta^{13}\text{C}_{\text{VPDB}}$ . For further calculations these values were converted to atom fraction excess (see equation 1 in Methods for details). Error bars refer to s.d.

**Table S1.** Studies of SDA at different temperatures. Change in SDA refers to change in total SDA energy across different temperatures.

| Study                             | Animal         | Change |
|-----------------------------------|----------------|--------|
| Crocker-Buta <i>et al.</i> , 2014 | colubrid snake | none   |
| Machida, 1981                     | fishes         | none   |
| McGaw and Whiteley, 2012          | crab           | none   |
| Powell <i>et al.</i> , 1999       | frog           | none   |
| Robertson <i>et al.</i> , 2002    | crab           | none   |
| Secor and Boehm, 2006             | salamander     | none   |
| Secor and Faulkner, 2002          | toad           | none   |
| Toledo <i>et al.</i> , 2003       | boa snake      | none   |
| Wang <i>et al.</i> , 2003         | python snake   | none   |
| Whiteley <i>et al.</i> , 2002     | isopod         | none   |
| Zaiden and Beaupre, 2003          | rattlesnake    | none   |
